# Supplementary material for: ETHE1 Accelerates Triple-Negative Breast Cancer Metastasis by Activating GCN2/eIF2α/ATF4 Signaling
Source: MDPI journal article supplement (doi:10.3390/ijms241914566), 2023-09-26
Supplement: s1 [file s1]

## **Supplementary information for**

ETHE1 accelerates triple-negative breast cancer metastasis by activating GCN2/eIF2 $\alpha$ /ATF4 signaling

### **This Supplementary information contains:**

Supplementary Figures: 2

Supplementary Tables: 4

## Supplementary figures and figure legends

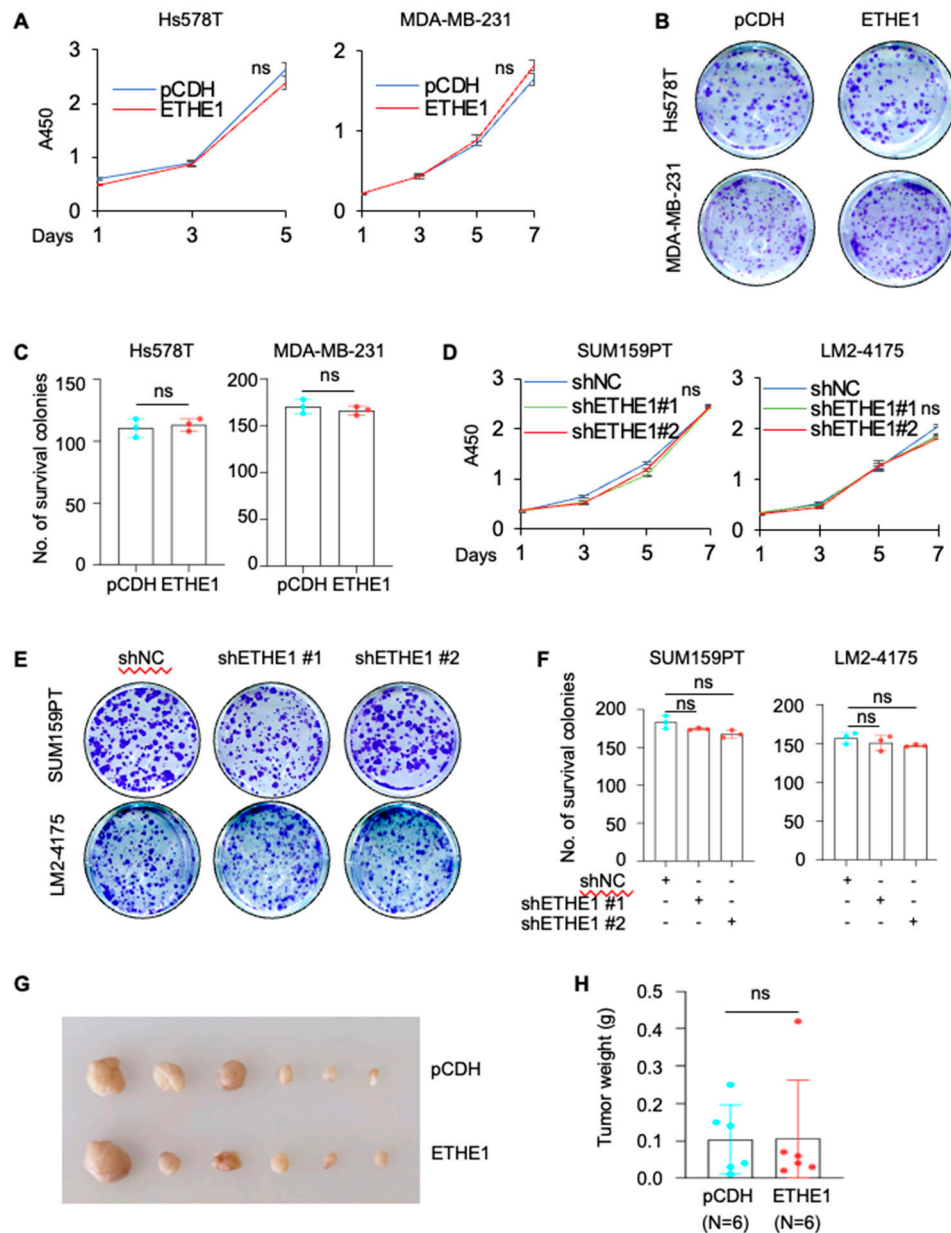

**Figure S1. ETHE1 has no remarkable effects on TNBC cell proliferation and xenograft tumor growth**

(A-C) Hs578T and MDA-MB-231 cells stably overexpressing ETHE1 were subjected to CCK-8 assays (A) and colony formation assays (B-C). Representative images of survival colonies (B) and corresponding quantitative results (C) are shown. (D-F) SUM159PT and LM2-4175 cells stably expressing shNC and shETHE1 (#1 and #2) were subjected to CCK-8 assays (D) and

colony formation assays (E-F). Representative images of survival colonies (E) and corresponding quantitative results (F) are shown. **(G-H)** A total of  $3 \times 10^6$  MDA-MB-231 cells stably expressing pCDH or Flag-ETHE1 were injected into the mammary fat pad of 5-week-old BALB/c female nude mice (n=6). After 6 weeks of inoculation, mice were sacrificed. The xenograft tumors were weighed and calculated. Representative images of xenograft tumors (G) and tumor weight (H) are shown.

ns, no significance.

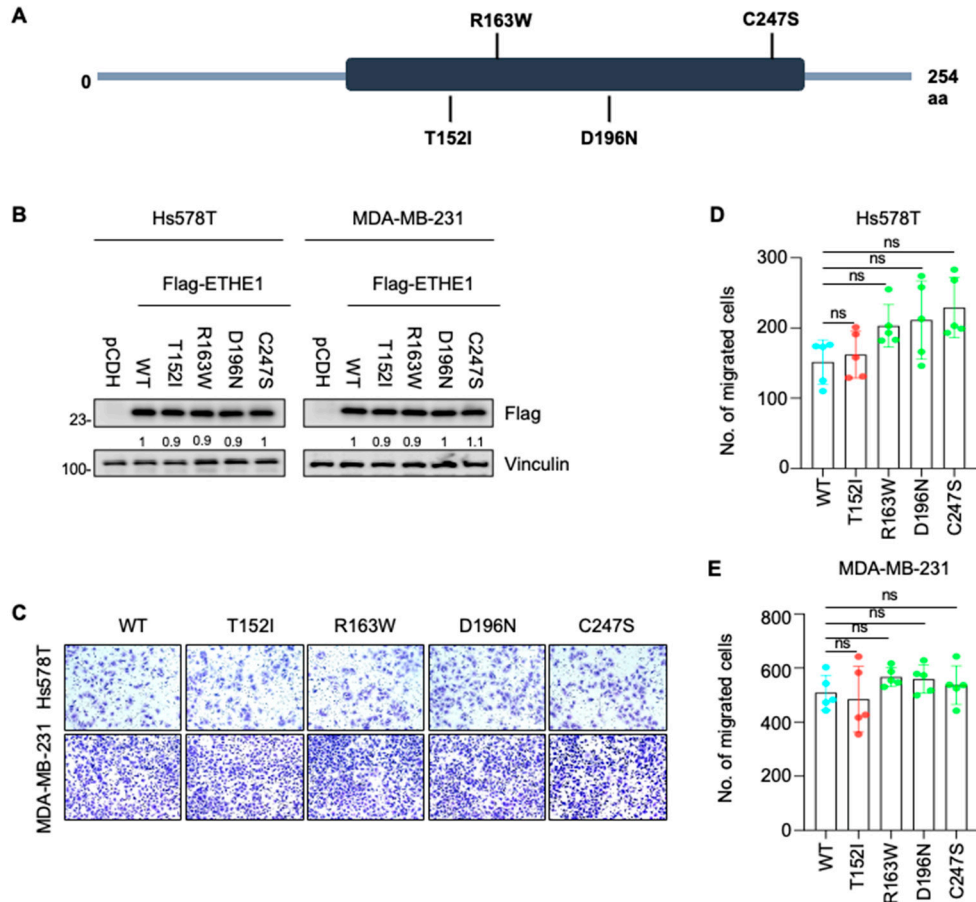

**Figure S2. ETHE1 promotes migratory and invasive potential of TNBC cells independent of its enzymatic activity**

(A) Common ETHE1 mutations are shown. (B) Hs578T and MDA-MB-231 cells stably expressing wild-type and mutant ETHE1 were subjected to immunoblotting analyses with the indicated antibodies. (C-E) Hs578T and MDA-MB-231 cells stably expressing wild-type and mutant ETHE1 were subjected to Transwell migration assays. Representative images of migrated cells (C) and quantitative results are shown in D and E.

ns, no significance.

## Supplementary Tables

**Table S1. Information for the used expression vectors**

| Plasmids    | Sources   | Vectors               |
|-------------|-----------|-----------------------|
| HA-ETHE1    | Subcloned | pLVX-IRES-Neo         |
| HA-EIF2S1   | Subcloned | pLVX-IRES-Neo         |
| Flag-ETHE1  | Subcloned | pCDH-CMV-MCS-EF1-Puro |
| Flag-EIF2S1 | Subcloned | pCDH-CMV-MCS-EF1-Puro |
| shETHE1 #1  | Subcloned | pLKO.1-TRC            |
| shETHE1 #2  | Subcloned | pLKO.1-TRC            |
| shGCN2      | Subcloned | pLKO.1-TRC            |
| shATF4      | Subcloned | pLKO.1-TRC            |

**Table S2. Primers used for molecular cloning**

| Plasmids    | Primers | Sequences                                                                   |
|-------------|---------|-----------------------------------------------------------------------------|
| HA-ETHE1    | Forward | GGATCTATTTCCGGTGAATCTAGAGCCACCATGGCGGA<br>GGCTGTACTG                        |
|             | Reverse | GGATCCGCGGCCGCTCTTTAAGCGTAGTCTGGGACGTC<br>GTATGGGTAGAATTCGGCAGTGGGTGTCTGCAC |
| Flag-ETHE1  | Forward | GATTCTAGAGCTAGCGAATTCGCCACCATGGCGGAGGCTG<br>TACTGAGGGTCG                    |
|             | Reverse | ATGGTCTTTGTAGTCGGATCCGGCAGTGGGTGTCTGCACC<br>CCACAG                          |
| Flag-EIF2S1 | Forward | GATTCTAGAGCTAGCGAATTCGCCACCATGCCGGGTCTAA<br>GTTGTAGATTTTAT                  |
|             | Reverse | ATGGTCTTTGTAGTCGGATCCATCTTCAGCTTTGGCTTCCA<br>TTTC                           |
| T152I       | Forward | CAGCATGGCCTTCATCGGAGATGCCCTGTTG                                             |
|             | Reverse | CAACAGGGCATCTCCGATGAAGGCCATGCTG                                             |
| R163W       | Forward | GTTGATCCGTGGGTGTGGGTGGACAGACTTCCAGCAAG                                      |
|             | Reverse | CTTGCTGGAAGTCTGTCCACCCACACCCACGGATCAAC                                      |
| D196N       | Forward | CTGATCTACCCTGCTCACAACCTACCATGGGTTCACAGTG                                    |
|             | Reverse | CACTGTGAACCCATGGTAGTTGTGAGCAGGGTAGATCAG                                     |
| C247S       | Forward | TCCAGCCAACATGCGCAGCGGGGTGCAGACA                                             |
|             | Reverse | CGGTTGTACGCGTCGCCCCACGTCTGTGGGT                                             |

**Table S3. shRNA targeting sequences**

| Targets    | Primers | Sequences                                                      |
|------------|---------|----------------------------------------------------------------|
| shETHE1 #1 | Forward | CCGGGCCCAGGCTGACTTACACATTCTCGAGAATGTGTAA<br>GTCAGCCTGGGCTTTTTG |
|            | Reverse | AATTCAAAAAGCCCAGGCTGACTTACACATTCTCGAGAAT<br>GTGTAAGTCAGCCTGGGC |
| shETHE1 #2 | Forward | CCGGGGCTGACTTACACATTGAGGACTCGAGTCCTCAATG<br>TGTAAGTCAGCCTTTTTG |
|            | Reverse | AATTCAAAAAGGCTGACTTACACATTGAGGACTCGAGTC<br>CTCAATGTGTAAGTCAGCC |
| shGCN2     | Forward | CCGGGCAGAGAAGCTTCCGATAATCCTCGAGGATTATCGG<br>AAGCTTCTCTGCTTTTTG |
|            | Reverse | AATTCAAAAAGCAGAGAAGCTTCCGATAATCCTCGAGGAT<br>TATCGGAAGCTTCTCTGC |
| shATF4     | Forward | CCGGGATCCAGTACCTGAAAGATTCTCGAGAAATCTTTC<br>AGGTACTGGATCTTTTTG  |
|            | Reverse | AATTCAAAAAGATCCAGTACCTGAAAGATTCTCGAGAA<br>ATCTTTCAGGTACTGGATC  |

**Table S4. Antibodies used in this study**

| Name                | Company        | Catalog Number |
|---------------------|----------------|----------------|
| GCN2                | Abcam          | ab134053       |
| p-eIF2 $\alpha$ S51 | ABclonal       | AP0692         |
| ATF4                | SinoBiological | 310527-T32     |
| ETHE1               | SinoBiological | 14681-T60      |
| eIF2 $\alpha$       | SinoBiological | 101112-T38     |
| Flag                | Sigma          | GNI4110-FG     |
| Vinculin            | Sigma          | V9131-0.2ML    |
| HA                  | CST            | 3724S          |
| Rabbit IgG          | CST            | 7074V          |
| Mouse IgG           | CST            | 7076V          |
